# Supplementary material for: ‘Hedvall effect’ in cryogrinding of molecular crystals. A case study of a polymorphic transition in chlorpropamide
Source: Royal Society of Chemistry journal article supplement (doi:10.1039/c1ce05189j), 2011-01-01
Supplement: c1ce05189j.pdf [file c1ce05189j.pdf]

## Figure Captions

Figure 1. A chlorpropamide molecule

Figure 2. SEM photographs of the chlorpropamide samples. a)  $\alpha$ -form, initial; b)  $\epsilon$ -form, initial, c)  $\alpha$ -form after grinding at room temperature, d)  $\epsilon$ -form after grinding at room temperature, e)  $\alpha$ -form after cryogrinding, f)  $\epsilon$ -form after cryogrinding, g)  $\alpha$ -form after 45 minutes at 77 K, h)  $\epsilon$ -form after 45 minutes at 77 K. Scale bar for all images is equal to 30  $\mu\text{m}$ .

Figure 3. X-ray powder diffraction patterns measured for  $\alpha$ -chlorpropamide: a) initial sample, b) grinding at room temperature, c) cryogrinding. Arrows mark reflections not belonging to  $\alpha$ -form.

Figure 4. X-ray powder diffraction patterns measured for  $\epsilon$ -chlorpropamide: a) initial sample, b) grinding at room temperature, c) cryogrinding. Stars mark the first two strong reflections of  $\alpha$ -chlorpropamide (200 and 201).

Figure 5. X-ray powder diffraction patterns of the sample of  $\epsilon$ -chlorpropamide stored during a long time: a) the sample a day after being obtained (a pure  $\epsilon$ -form), b) the same sample after 196 days of storage without removal from the holder, c) the same sample after 431 days of storage without removal from the holder. Stars mark the first two strong reflections of  $\alpha$ -chlorpropamide (200 and 201).

Figure 6. An overlay of chlorpropamide molecules in  $\alpha$ - (yellow),  $\epsilon$ - (pink),  $\epsilon'$  (blue) forms.

Figure 7. Crystal packing in  $\alpha$ -,  $\epsilon$ -,  $\epsilon'$ - forms.
